# Supplementary material for: Differences in the Shiga Toxin (Stx) 2a Phage Regulatory Switch Region Influence Stx2 Localization and Virulence of Stx-Producing Escherichia coli in Mice
Source: MDPI journal article supplement (doi:10.3390/microorganisms11081925), 2023-07-28
Supplement: s1 [file s1]

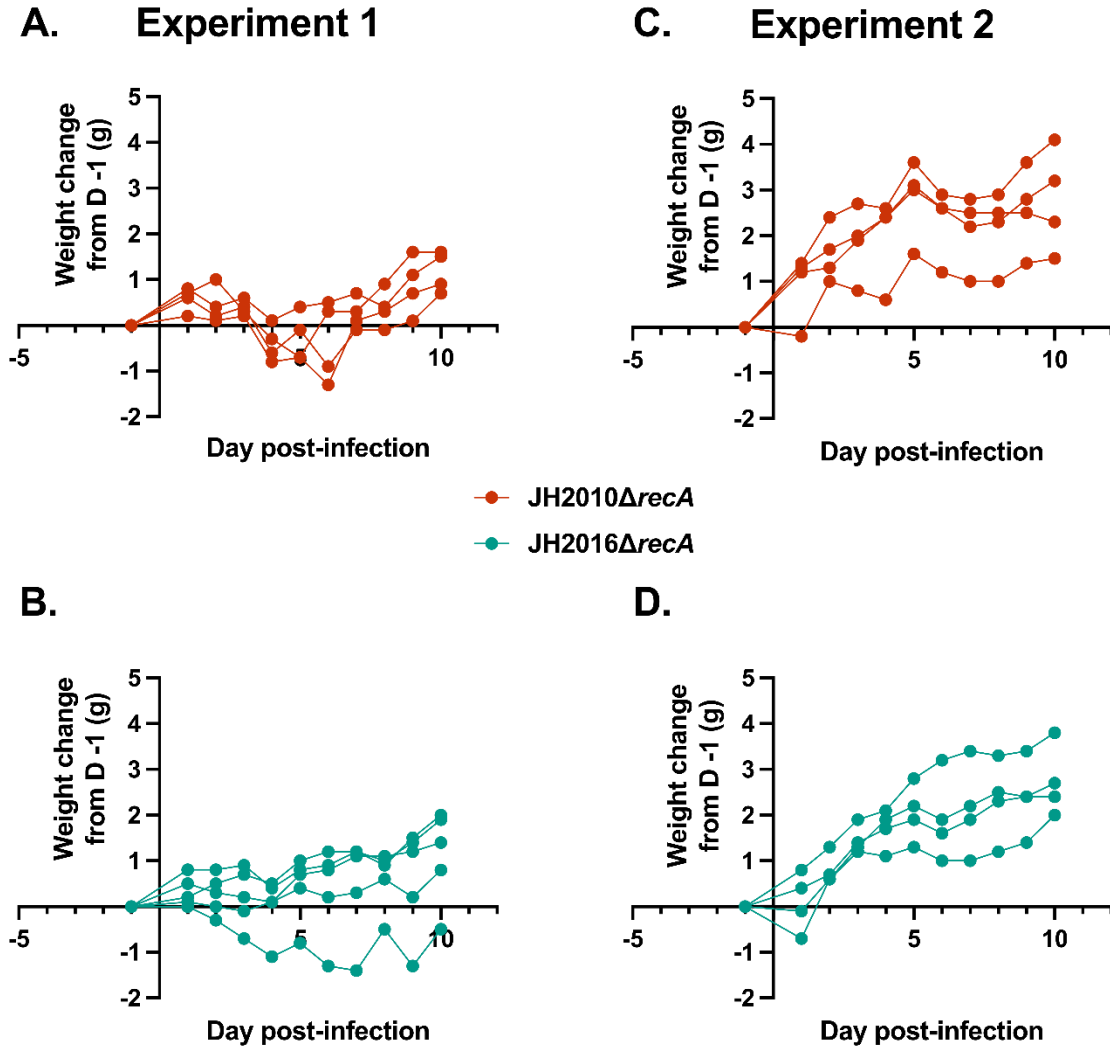

**Figure S2. *In vivo recA* mutant strain mouse weights.** Str-treated mice were infected with either JH2010 $\Delta$ *recA* or JH2016 $\Delta$ *recA* in individual experiments 1 (A,B) and 2 (C,D). Daily weights for individual infected mice were measured starting at day 1 (D1) post-infection, and are displayed as the difference in weight from 24 hours pre-infection (D-1).
