# Supplementary material for: Differences in the Shiga Toxin (Stx) 2a Phage Regulatory Switch Region Influence Stx2 Localization and Virulence of Stx-Producing Escherichia coli in Mice
Source: MDPI journal article supplement (doi:10.3390/microorganisms11081925), 2023-07-28
Supplement: s1 [file s1]

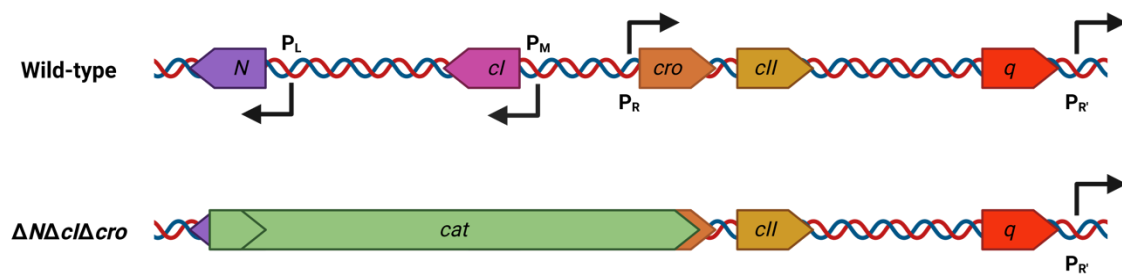

**Figure S4. Diagrams of the *N* to *q* region of the wild-type *stx*-phage and the deletion mutant strains.** The wild-type diagram (not to scale) shows the relative locations of genes encoding key regulatory proteins (*N*, *cl*, *cII*, *cro*, *q*) and elements (promoters  $P_L$ ,  $P_M$ ,  $P_R$ ,  $P_{R'}$ ) on the *stx*-phage. The  $\Delta N\Delta cl\Delta cro$  diagram shows the predicted deletion of the specified regulatory genes through lambda Red-mediated recombination by insertion of a chloramphenicol resistance cassette (*cat*).
