# Supplementary material for: Differences in the Shiga Toxin (Stx) 2a Phage Regulatory Switch Region Influence Stx2 Localization and Virulence of Stx-Producing Escherichia coli in Mice
Source: MDPI journal article supplement (doi:10.3390/microorganisms11081925), 2023-07-28
Supplement: s1 [file s1]

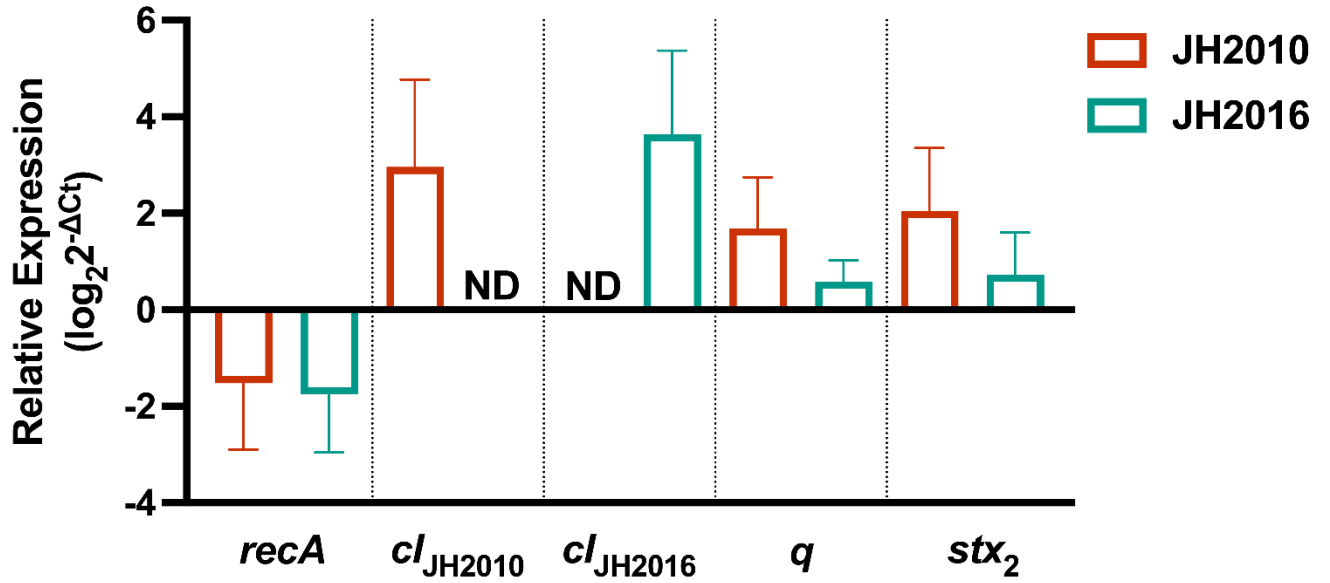

Figure S5. Gene expression of wild-type JH2010 and JH2016 by RT-qPCR. Relative transcription of genes from overnight LB-YE cultures of JH2010 and JH2016 as measured by RT-qPCR. Results are graphed as mean log fold-change from *gyrB* transcript  $\pm$  SD ( $n = 8$ ). Significance was calculated by one-way ANOVA with Šídák's test for multiple comparisons.
