# Supplementary material for: Differences in the Shiga Toxin (Stx) 2a Phage Regulatory Switch Region Influence Stx2 Localization and Virulence of Stx-Producing Escherichia coli in Mice
Source: MDPI journal article supplement (doi:10.3390/microorganisms11081925), 2023-07-28
Supplement: s1 [file s1]

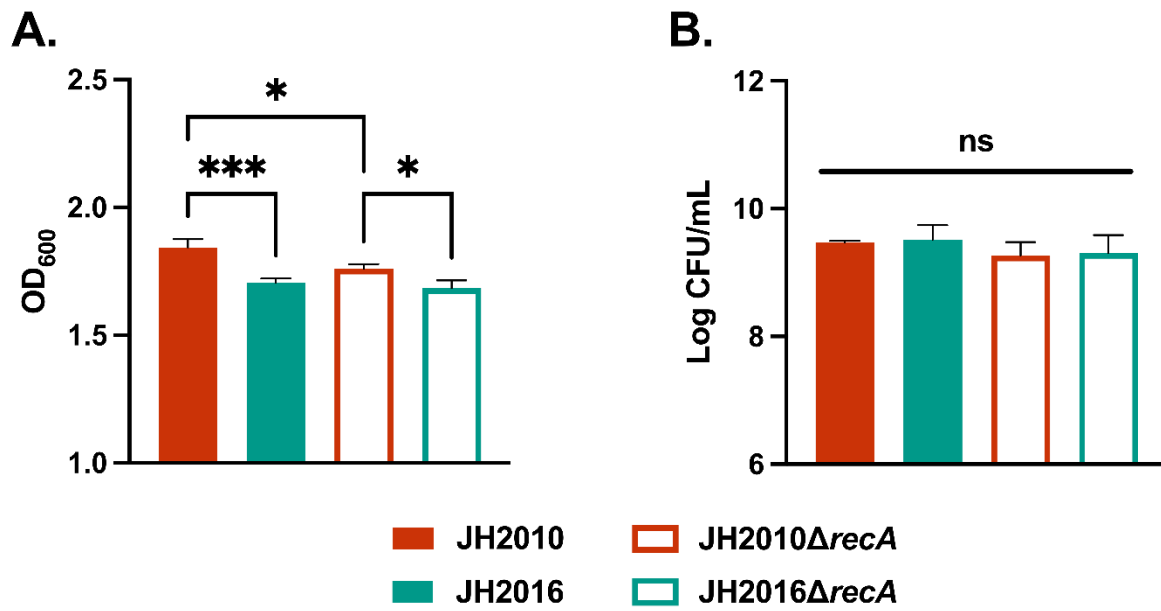

**Figure S1. *In vitro* growth of wild-type and *recA* mutant strains.** Overnight cultures grown in LB-YE of JH2010, JH2016, and the corresponding *recA* mutant strains, were assayed for growth by measuring (A) the optical density at 600 nm (OD<sub>600</sub>) or by (B) measuring the number of colony forming units (CFU) per mL of culture. Significance was calculated by one-way ANOVA with Šídák's test for multiple comparisons. \* $P < 0.05$ , \*\*\* $P < 0.001$ .
