# Supplementary material for: Differences in the Shiga Toxin (Stx) 2a Phage Regulatory Switch Region Influence Stx2 Localization and Virulence of Stx-Producing Escherichia coli in Mice
Source: MDPI journal article supplement (doi:10.3390/microorganisms11081925), 2023-07-28
Supplement: s1 [file s1]

**TABLE S2: Appearance of *cI*<sub>JH2010</sub> and *cI*<sub>JH2016</sub> sequences within the PulseNet reference library.**

NCBI Blast queries were conducted using *cI*<sub>JH2010</sub> and *cI*<sub>JH2016</sub> nucleotide sequences to compare within the PulseNet NCBI database (BioProject #PRJNA218110). The presence of *stx* subtypes and location of the *cI* genes was determined by NCBI annotation.

| CI type                     | Strain Name<br>(Accession #)                                         | Accession # | Type(s) of <i>stx</i><br>genes present              | Location of <i>cI</i>           |
|-----------------------------|----------------------------------------------------------------------|-------------|-----------------------------------------------------|---------------------------------|
| <i>cI</i> <sub>JH2010</sub> | <i>Escherichia coli</i><br>strain 08-3914<br>(parental of JH2011)    | CP034808.1  | <i>stx</i> <sub>2a</sub> , <i>stx</i> <sub>2c</sub> | <i>stx</i> <sub>2a</sub> -phage |
|                             | <i>Escherichia coli</i><br>strain 2014C-3338                         | CP027452.1  | <i>stx</i> <sub>1a</sub> , <i>stx</i> <sub>2a</sub> | <i>stx</i> <sub>1a</sub> -phage |
|                             | <i>Escherichia coli</i><br>strain 2013C-4404*                        | CP027376.1  | <i>stx</i> <sub>1a</sub>                            | <i>stx</i> <sub>1a</sub> -phage |
|                             | <i>Escherichia coli</i><br>strain 2013C-4390*                        | CP027484.1  | <i>stx</i> <sub>1c</sub>                            | <i>stx</i> <sub>1c</sub> -phage |
|                             | <i>Escherichia coli</i><br>strain 2014C-3741                         | CP027328.1  | <i>stx</i> <sub>1c</sub> , <i>stx</i> <sub>2b</sub> | <i>stx</i> <sub>1c</sub> -phage |
|                             |                                                                      |             |                                                     |                                 |
| <i>cI</i> <sub>JH2016</sub> | <i>Escherichia coli</i><br>strain<br>PNUSAE013304*                   | CP034936.1  | <i>stx</i> <sub>2a</sub> , <i>stx</i> <sub>2c</sub> | <i>stx</i> <sub>2a</sub> -phage |
|                             | <i>Escherichia coli</i><br>strain 2009C-4687                         | CP034799.1  | <i>stx</i> <sub>2a</sub> , <i>stx</i> <sub>2c</sub> | <i>stx</i> <sub>2a</sub> -phage |
|                             | <i>Escherichia coli</i><br>strain 2010C-3142<br>(parental of JH2017) | CP034801.1  | <i>stx</i> <sub>2a</sub> , <i>stx</i> <sub>2c</sub> | <i>stx</i> <sub>2a</sub> -phage |
|                             | <i>Escherichia coli</i><br>strain 2017C-4109                         | CP030767.1  | <i>stx</i> <sub>2a</sub> , <i>stx</i> <sub>2c</sub> | <i>stx</i> <sub>2a</sub> -phage |
|                             | <i>Escherichia coli</i><br>strain 97-3250                            | CP027599.1  | <i>stx</i> <sub>1a</sub> , <i>stx</i> <sub>2a</sub> | <i>stx</i> <sub>1a</sub> -phage |
|                             | <i>Escherichia coli</i><br>strain 2014C-3011                         | CP027591.1  | <i>stx</i> <sub>2c</sub>                            | Non- <i>stx</i> -phage          |
|                             | <i>Escherichia coli</i><br>strain 2013C-3264                         | CP027544.1  | <i>stx</i> <sub>1a</sub>                            | Non- <i>stx</i> -phage          |
|                             | <i>Escherichia coli</i><br>strain 2013C-3252                         | CP027442.1  | <i>stx</i> <sub>1a</sub>                            | <i>stx</i> <sub>1a</sub> -phage |

|                                                     |            |                                                     |                                 |
|-----------------------------------------------------|------------|-----------------------------------------------------|---------------------------------|
| <i>Escherichia coli</i><br>strain 2011C-4251        | CP027388.1 | <i>stx</i> <sub>1a</sub> , <i>stx</i> <sub>2a</sub> | <i>stx</i> <sub>1a</sub> -phage |
| <i>Escherichia coli</i><br>strain 2015C-3101        | CP027221.1 | <i>stx</i> <sub>1a</sub> , <i>stx</i> <sub>2a</sub> | <i>stx</i> <sub>2a</sub> -phage |
| <i>Escherichia coli</i><br>strain 2015C-3163        | CP027219.1 | <i>stx</i> <sub>1a</sub>                            | <i>stx</i> <sub>1a</sub> -phage |
| <i>Escherichia coli</i><br>strain 2011C-4315        | CP024479.1 | <i>stx</i> <sub>1a</sub>                            | <i>stx</i> <sub>1a</sub> -phage |
| <i>Escherichia coli</i><br>strain 2013C-4465        | CP015241.1 | <i>stx</i> <sub>1a</sub>                            | <i>stx</i> <sub>1a</sub> -phage |
| <i>Escherichia coli</i><br>strain 90-3040           | CP027459.1 | <i>stx</i> <sub>2a</sub>                            | <i>stx</i> <sub>2a</sub> -phage |
| <i>Escherichia coli</i><br>strain 2013C-4538        | CP027582.1 | <i>stx</i> <sub>1a</sub>                            | <i>stx</i> <sub>1a</sub> -phage |
| <i>Escherichia coli</i><br>strain 2014C-3050        | CP027472.1 | <i>stx</i> <sub>1a</sub>                            | <i>stx</i> <sub>1a</sub> -phage |
| <i>Escherichia coli</i><br>strain 2014C-3599        | CP027435.1 | <i>stx</i> <sub>2a</sub>                            | <i>stx</i> <sub>2a</sub> -phage |
| <i>Escherichia coli</i><br>strain 2014C-3655        | CP027351.1 | <i>stx</i> <sub>2a</sub>                            | <i>stx</i> <sub>2a</sub> -phage |
| <i>Escherichia coli</i><br>strain 2015C-3107        | CP027317.1 | <i>stx</i> <sub>2a</sub>                            | <i>stx</i> <sub>2a</sub> -phage |
| <i>Escherichia coli</i><br>strain 2014C-4423        | CP027454.1 | <i>stx</i> <sub>2a</sub>                            | <i>stx</i> <sub>2a</sub> -phage |
| <i>Escherichia coli</i><br>strain 2014C-3003*       | CP027672.1 | <i>stx</i> <sub>1c</sub>                            | <i>stx</i> <sub>1c</sub> -phage |
| <i>Escherichia coli</i><br>strain 2013C-3033        | CP027323.1 | <i>stx</i> <sub>1a</sub> , <i>stx</i> <sub>1c</sub> | <i>stx</i> <sub>1a</sub> -phage |
| <i>Escherichia coli</i><br>strain 2017C-<br>4173W12 | CP030768.1 | None                                                | Non- <i>stx</i> -phage          |

\* Strains that did not have NCBI annotation data. For these strains, VirulenceFinder (at 95% identity, 80% coverage) was used to determine the types of *stx* genes present, and proximity of the *cl* nucleotide query to the identified *stx* genes was used to determined the location
