# Supplementary material for: Differences in the Shiga Toxin (Stx) 2a Phage Regulatory Switch Region Influence Stx2 Localization and Virulence of Stx-Producing Escherichia coli in Mice
Source: Microorganisms. 2023 Jul 28;11(8):1925. doi: 10.3390/microorganisms11081925 (PMC10458857; doi:10.3390/microorganisms11081925)
Supplement: Supplementary file 1 [file microorganisms-11-01925-s001.zip]

Archive with 7 entries (7 files):
- Supplemental figure S1.pdf
- Supplemental figure S2.pdf
- Supplemental figure S3.pdf
- Supplemental figure S4.pdf
- Supplemental figure S5.pdf
- Supplemental table S1.pdf
- Supplemental table S2.pdf
